# Supplementary material
Source: publisher figshare collection journal article supplement (https://tandf.figshare.com/ndownloader/files/13877960)

**Supplementary material, Figure S2: Residual diagnostic plots for the GLM model fitted as specified for equation 3 in Results of the text.**


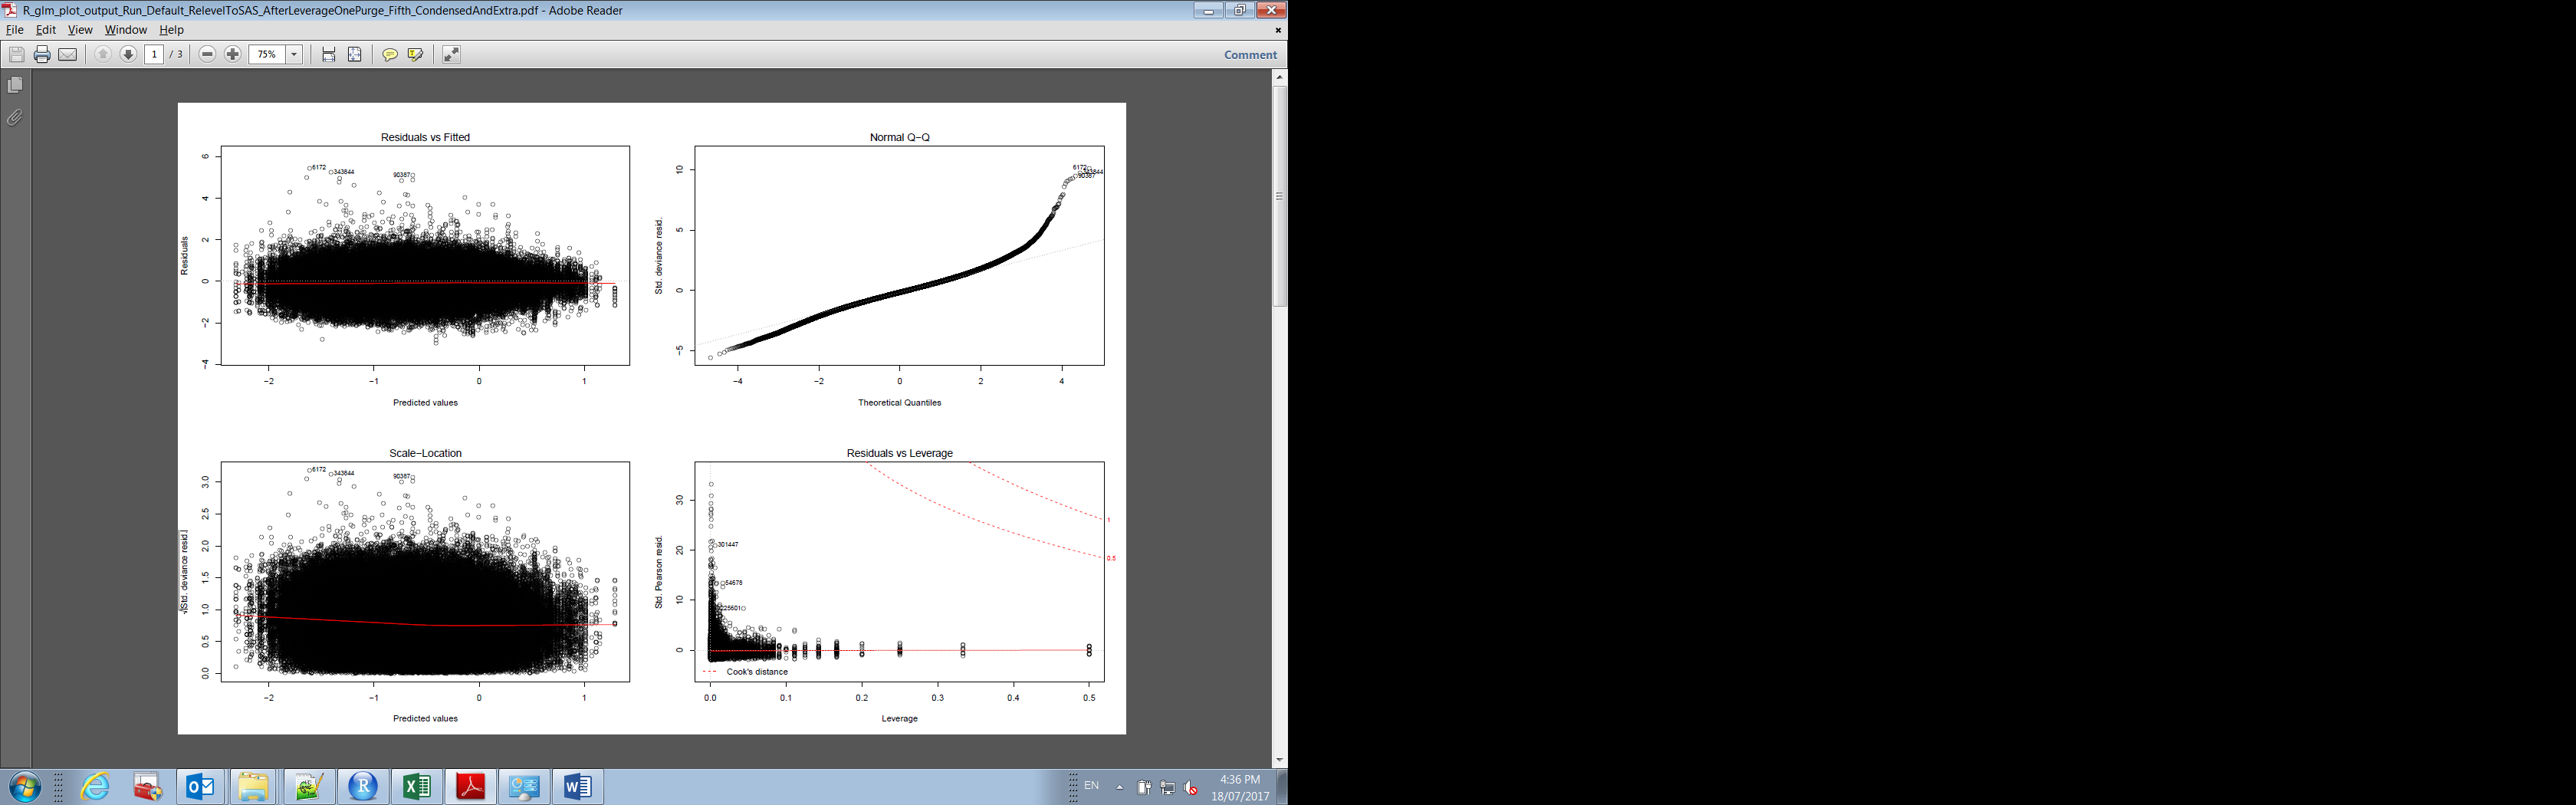

Supplement: Supplementary file 1 [file 13877960]
